# Supplementary material for: Chemoenzymatic Synthesis and Antibody Binding of HIV-1 V1/V2 Glycopeptide-Bacteriophage Qβ Conjugates as a Vaccine Candidate
Source: MDPI journal article supplement (doi:10.3390/ijms222212538), 2021-11-21

## Supporting Information

# Chemoenzymatic Synthesis and Antibody Binding of HIV-1 V1/V2 Glycopeptide-Bacteriophage Q $\beta$ Conjugates as a Vaccine Candidate

Guanghui Zong <sup>1,†</sup>, Christian Toonstra <sup>1,†</sup>, Qiang Yang <sup>1</sup>, Roushu Zhang <sup>1</sup> and Lai-Xi Wang <sup>1,\*</sup>

<sup>1</sup> Department of Chemistry and Biochemistry, University of Maryland, College Park, Maryland 20742, United States

<sup>†</sup> Equal contributions as co-first authors

\* Correspondence: wang518@umd.edu; Tel.: +1-301-405-7527 (L.X.W.)

## Table of Contents

|                               |       |
|-------------------------------|-------|
| 1. RP-HPLC and LC/MS Profiles | S2-12 |
|-------------------------------|-------|

## **RP-HPLC and ESI-MS Profiles of (Glyco)peptides**

HPLC conditions:

Analytical reverse-phase HPLC was performed on a Waters Alliance<sup>®</sup> e2695 HPLC system equipped with a dual absorbance 2489 UV/Vis detector. Separations were performed using a C18 column (YMC-Triart C18, 4.6 × 250 mm, 5 μm) at a flow rate of 1 mL/min using a linear gradient of 5-40% MeCN containing 0.1% FA over 30 min. ESI-MS spectra were obtained using a Waters SQ Detector 2 single quadrupole mass spectrometer.

Figure S1. HPLC profile of cyclic GlcNAc-peptide **4**

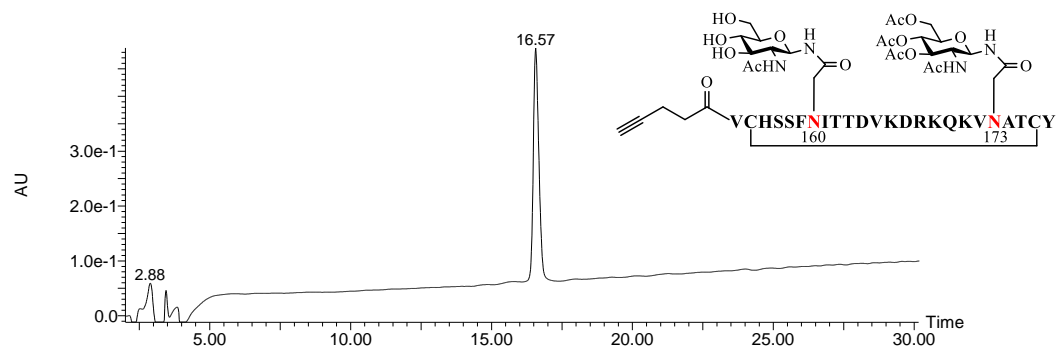

A. (UV Abs. 214 nm)

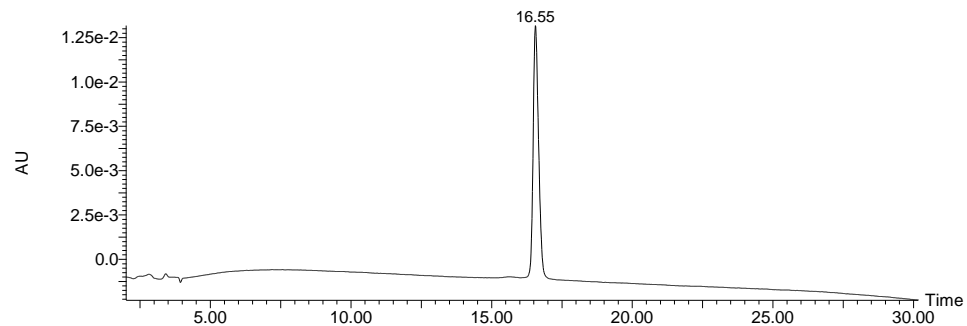

B. (UV Abs. 280 nm)

Figure S2. ESI-MS profile of cyclic GlcNAc-peptide **4**

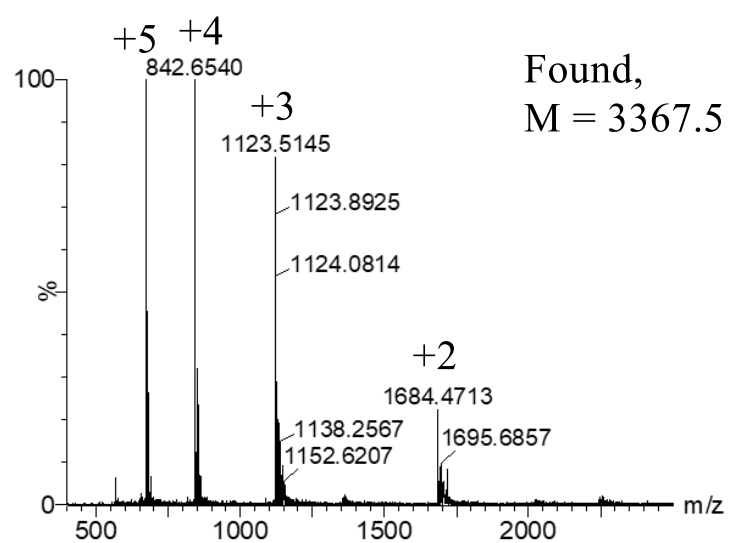

Figure S3. HPLC profile of cyclic GlcNAc-peptide **5**

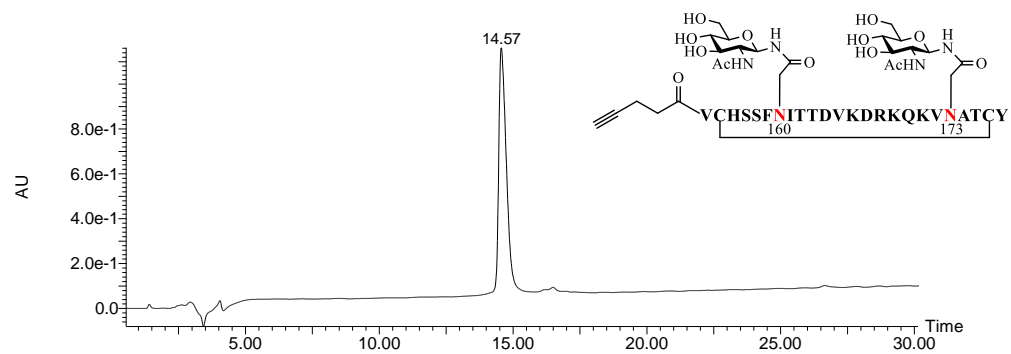

A. (UV Abs. 214 nm)

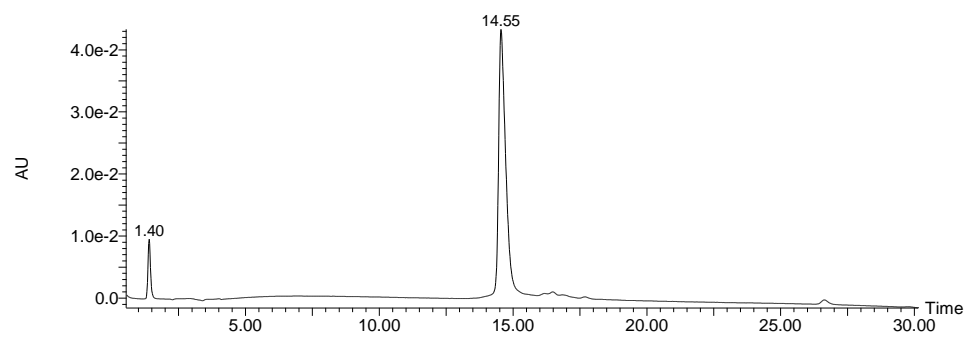

B. (UV Abs. 280 nm)

Figure S4. ESI-MS profile of cyclic GlcNAc-peptide **5**

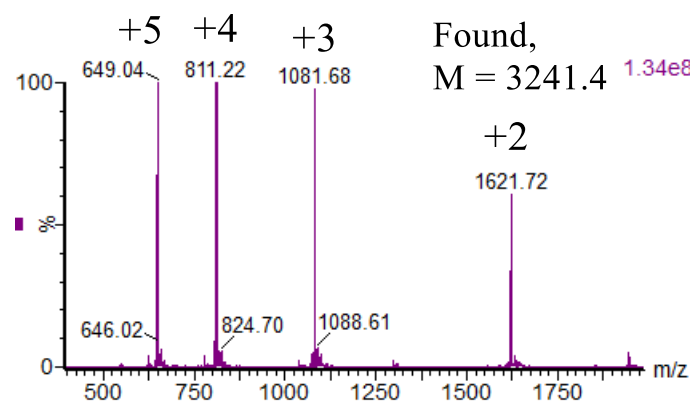

Figure S5. HPLC profile of cyclic GlcNAc-peptide **8**

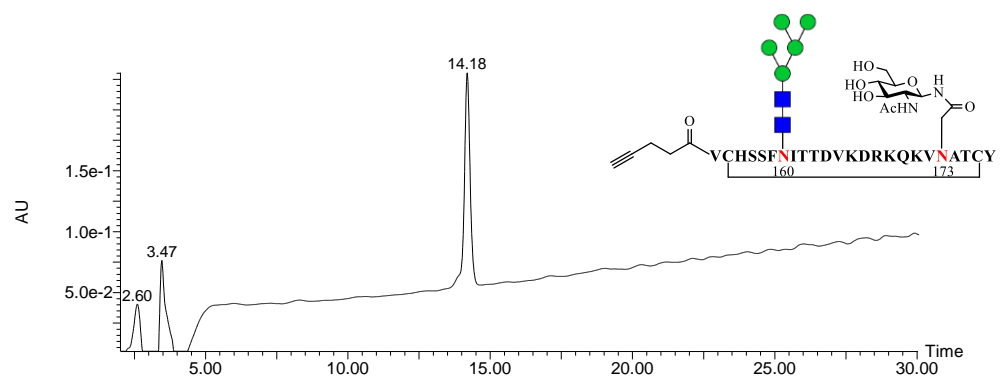

A. (UV Abs. 214 nm)

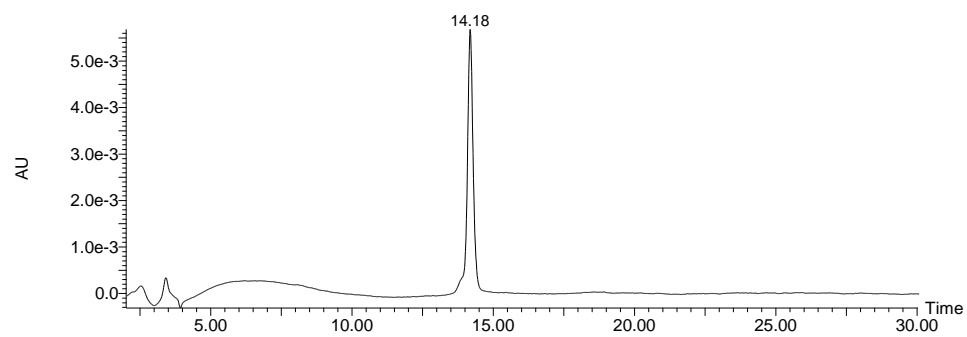

B. (UV Abs. 280 nm)

Figure S6. ESI-MS profile of cyclic glycopeptide **8**

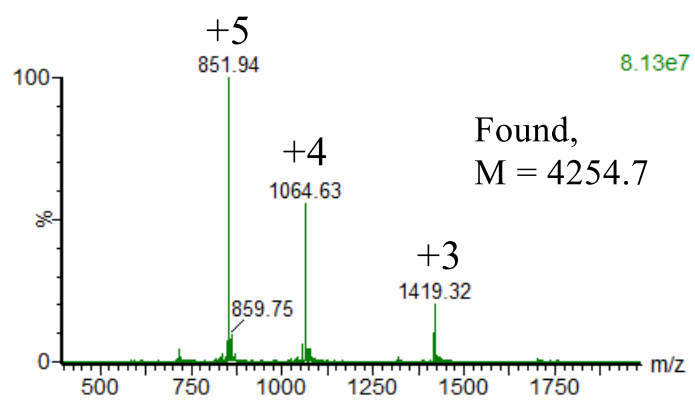



Figure S7. HPLC profile of cyclic glycopeptide **10**

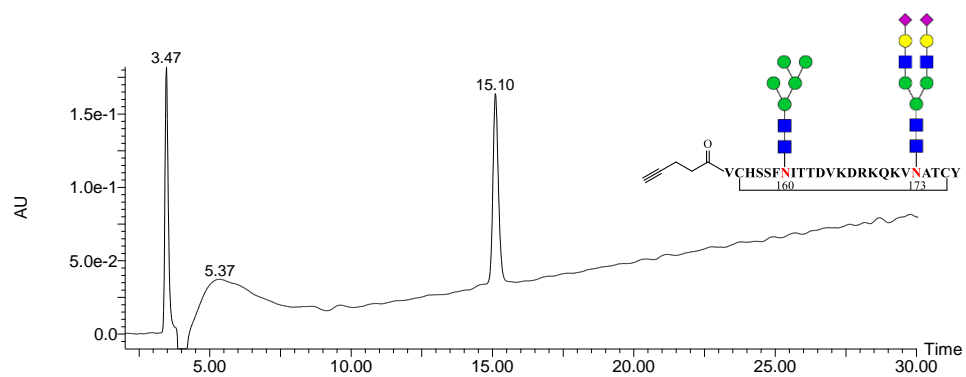

A. (UV Abs. 214 nm)

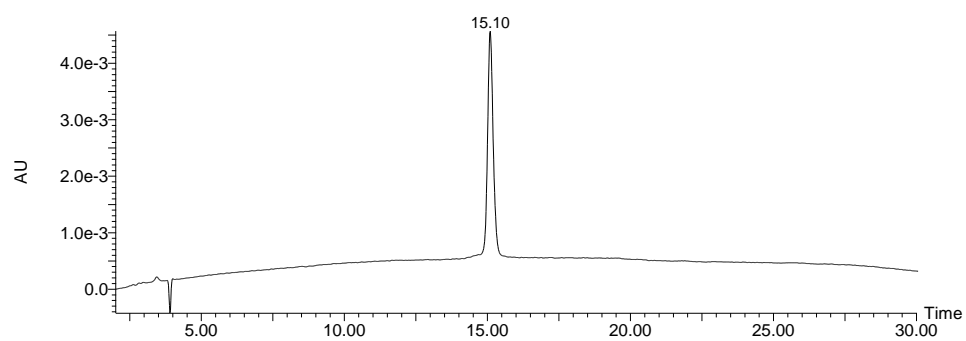

B. (UV Abs. 280 nm)

Figure S8. ESI-MS profile of cyclic glycopeptide **10**

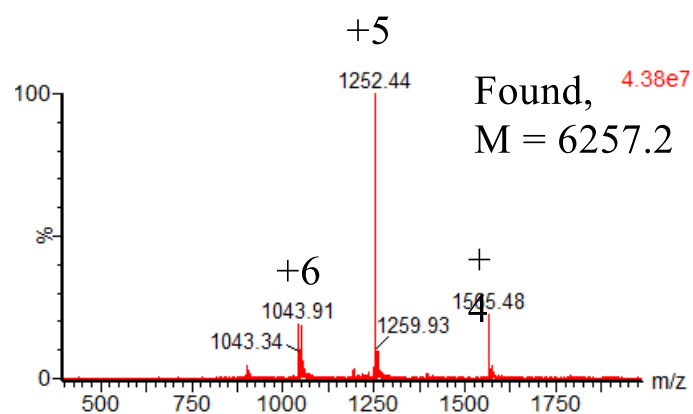

Figure S9. HPLC profile of cyclic glycopeptide **11**

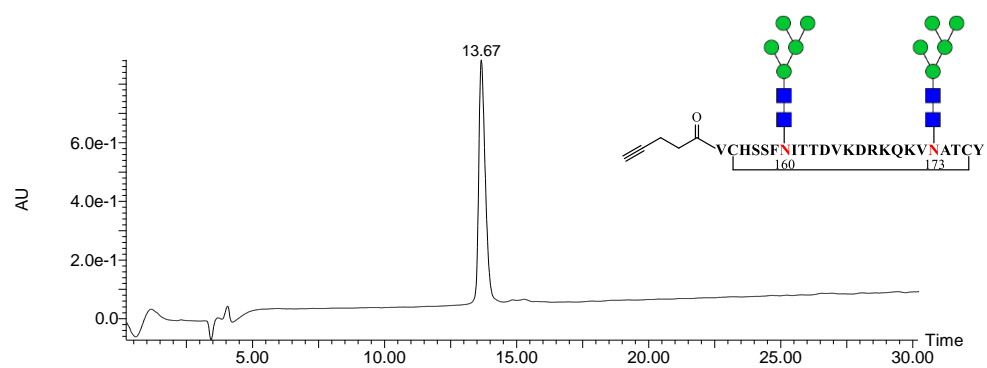

A. (UV Abs. 214 nm)

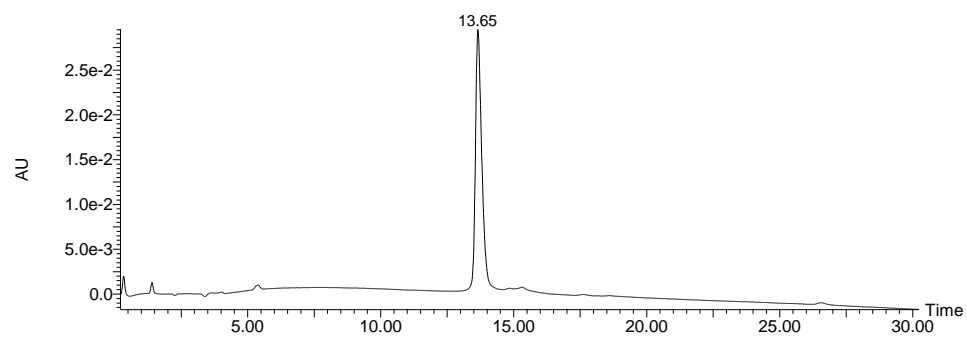

B. (UV Abs. 280 nm)

Figure S10. ESI-MS profile of cyclic glycopeptide **11**

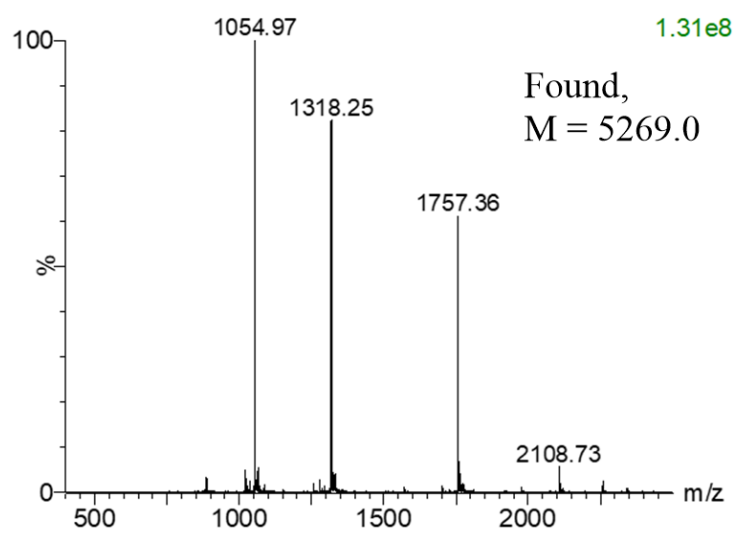

Supplement: s1 [file s1]
